## Age differences in mortality in patients undergoing surgery for infective endocarditis

L. Ostergaard<sup>1</sup>, M.H. Smerup<sup>1</sup>, K. Iversen<sup>2</sup>, A.D. Jensen<sup>1</sup>, A. Dahl<sup>3</sup>, S. Chamat<sup>3</sup>, N. Eske Bruun<sup>4</sup>, J.H. Butt<sup>1</sup>, H. Bundgaard<sup>1</sup>, C. Torp-Pedersen<sup>5</sup>, L. Kober<sup>1</sup>, E.L. Fosbol<sup>1</sup>

<sup>1</sup>Rigshospitalet - Copenhagen University Hospital, The Heart Centre, Copenhagen, Denmark; <sup>2</sup>Herlev Hospital, Department of cardiology, Herlev, Denmark; <sup>3</sup>Gentofte University Hospital, Department of cardiology, Copenhagen, Denmark; <sup>4</sup>Zealand University Hospital, Department of cardiology, Roskilde, Denmark; <sup>5</sup>Hillerød Hospital, Department of cardiology, Hillerød, Denmark

**Funding Acknowledgement:** Type of funding source: None

**Background:** Infective endocarditis (IE) is associated with high mortality. Surgery may improve survival, but the intercept between benefit and harm is hard to balance and may be closely related to age.

**Purpose:** To examine the in-hospital and 90-day mortality in patients undergoing surgery for IE and to identify differences between age groups and type of valvular intervention.

**Methods:** By crosslinking nationwide Danish registries we identified patients with first-time IE undergoing surgical treatment in the period from 2000 to 2017. The study population was grouped in patients <60 years, 60–75 years, and ≥75 years of age. High-risk subgroups by age and surgical valve intervention (mitral vs aortic vs mitral+aortic) during IE admission were examined. Kaplan Meier estimates was used to identify 90-day mortality by age groups and multivariable adjusted Cox proportional hazard analysis was used to examine factors associated with 90-day mortality.

**Results:** We included 1,767 patients with IE undergoing surgery, 735 patients <60 years (24.1% female), 766 patients 60–75 years (25.8% female), and 266 patients ≥75 years (36.1% female). The proportion of patients with IE undergoing surgery was 35.3%, 26.9%, and 9.1% for patients

<60 years, 60–75 years, and ≥75 years, respectively. For patients with IE undergoing surgery, the in-hospital mortality was 6.4%, 13.6%, and 20.3% for patients <60 years, 60–75 years, and ≥75 years of age, respectively and mortality at 90 days were 7.5%, 13.9%, and 22.3%, respectively. Factors associated with an increased risk 90-day mortality were: mitral valve surgery and a combination of mitral and aortic valve surgery as compared with isolated aortic valve surgery, patients 60–75 years and ≥75 years as compared with patients aged <60 years, prosthetic heart valve prior to IE admission, and diabetes, Figure. Patients ≥75 years undergoing a combination of mitral and aortic valve surgery had an in-hospital mortality of 36.3%.

**Conclusion:** In patients undergoing surgery for IE, a stepwise increase in 90-day mortality was seen for age groups, highest among patients ≥75 years with a 90-day mortality of more than 20%. Patients undergoing mitral and combined mitral and aortic valve surgery as compared to isolated aortic valve surgery were associated with a higher mortality. These findings may be of importance for the management strategy of patients with IE.

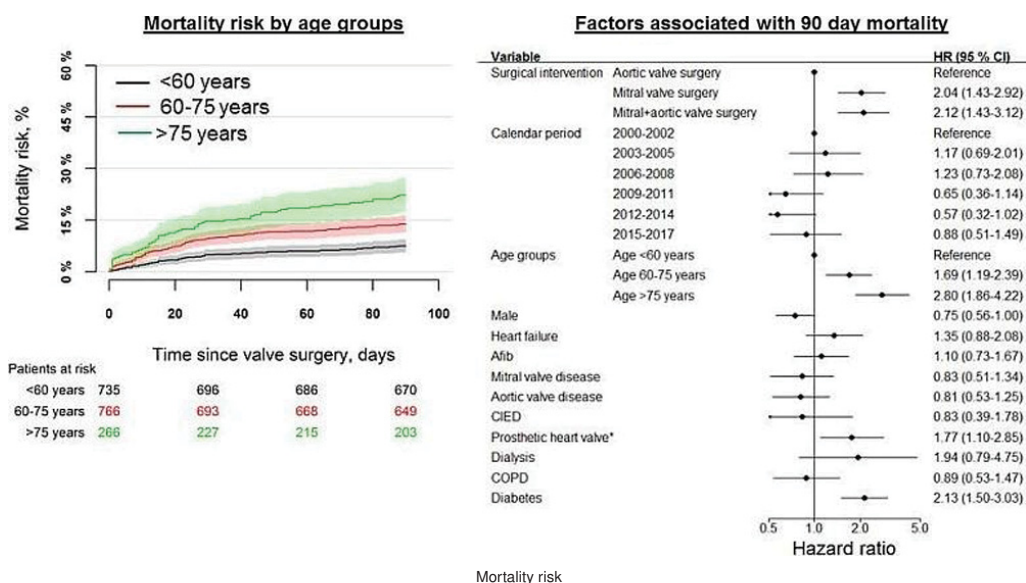

Mortality risk
